# Supplementary material
Source: Springer Nature journal article supplement (https://www.springermedizin.de/resource/supplementary/13054_2013_2889_MOESM4_ESM.pdf/9714176)

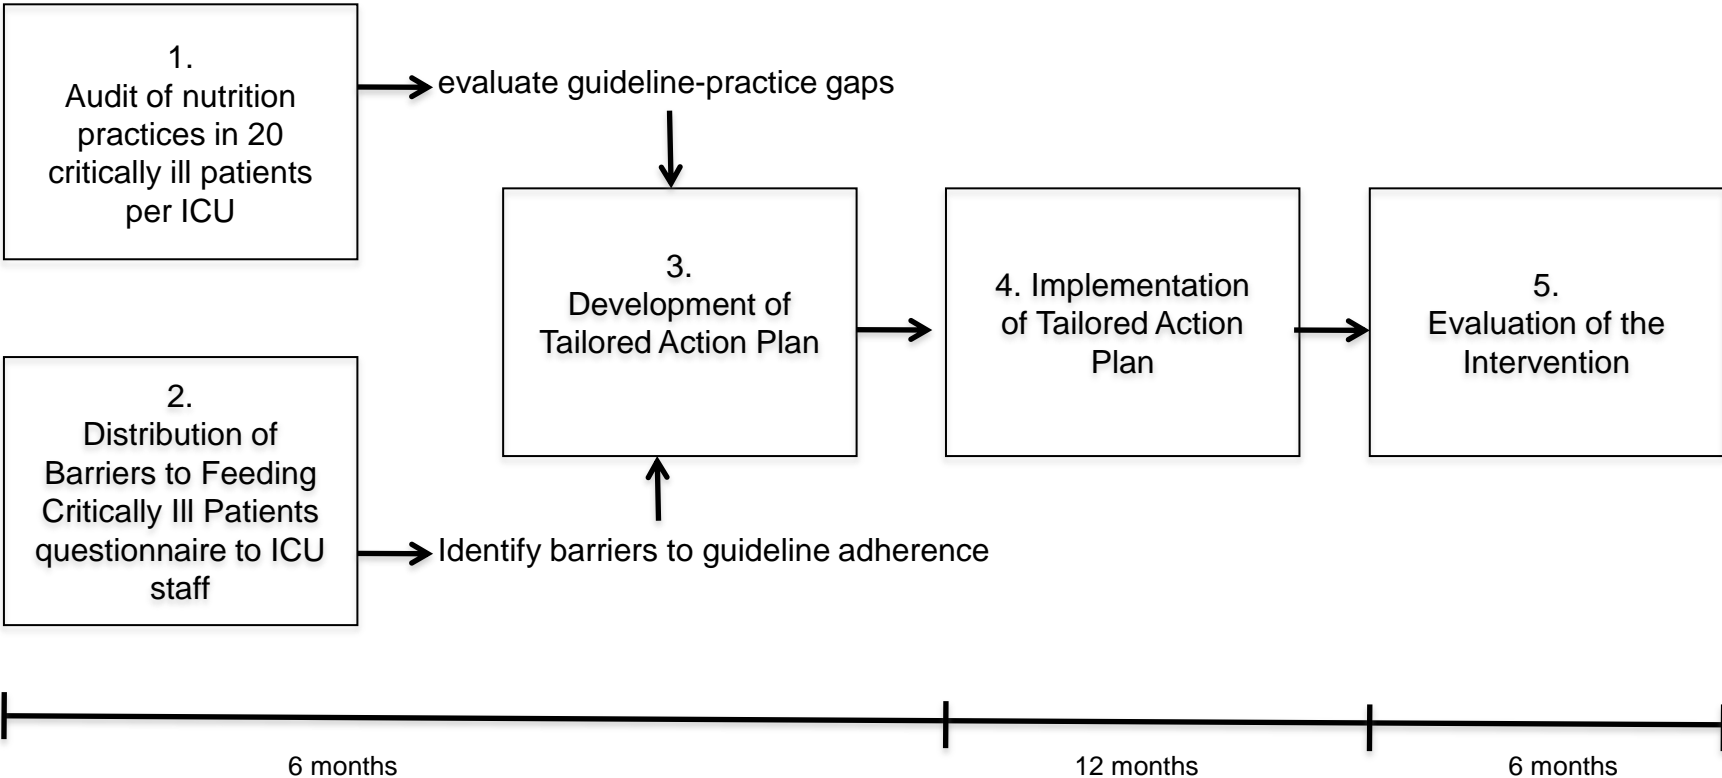

Supplement: MOESM4 [file 9714176]
